# Supplementary material for: Giant magneto-cubic in-plane Hall effect in a nonmagnetic material
Source: Research Square preprint supplement (doi:10.21203/rs.3.rs-7152388/v1), 2025-07-24
Supplement: Supplementary file 1 [file 7c301507f55a9e2cd3a0dc9b.docx]

Supplementary Information for

# Giant magneto-cubic in-plane Hall effect in a nonmagnetic material

1. Composition and crystal structure of LuAuSn

2. Out-of-plane magnetoresistance and Hall resistivity of LuAuSn single crystal

3. *B*-dependent in-plane Hall effect at 2 K

4. The calculation of in-plane Hall conductivity for sample #2

5. The temperature dependent IPHE at 6 T and 9 T for sample #1

6. Comparison of our in-plane Hall conductivity with previously reported data

**Supplementary note 1：Composition and crystal structure of LuAuSn.**

Energy dispersive X-ray spectroscopy (EDS), X-ray diffraction (XRD) and Laue diffraction were used to confirm the composition, crystal structure and crystal orientation of LuAuSn sample. The analysis of a spectrum shown in Fig. S1**a** yielded the Lu:Au:Sn molar ratio of 1.12:0.93:1, which is close to the stoichiometric ratio of 1:1:1. The color maps shown in Fig. S1**b**, representing elemental distributions of Lu, Au and Sn, indicate their uniform distribution on the surface of the sample. Both XRD and Laue diffraction patterns identified the (111) plane, as shown in Fig. S1**d**.





Figure S1 **a** The EDS spectrum of the LuAuSn single crystal. **b** The elemental maps of Lu, Au, Sn show the elemental homogeneity. **c** The photo picture of LuAuSn single crystal with a (111) plane facing the camera. **d** The XRD of (111) plane of LuAuSn single crystal. The inset shows the Laue diffraction image for incident X-ray beam closed to [111] direction.

**Supplementary note 2：****Out-of-plane magnetoresistance and Hall resistivity of LuAuSn single crystal.**

As shown in Fig. S2**a**, the electrical resistivity of LuAuSn shows a metallic dependence on temperature. At temperature from 2K to 300K, LuAuSn shows a large positive magnetoresistance (MR) (Fig. S2**b**). In *T* < 75K, the MR is larger than 100%. Fig. S2**c** shows the Hall resistivity at different *T*. Obviously, the nonlinear behavior indicate it may be consistent with two-carrier model.

where e is elementary charge, and are carrier densities for hole and electron, and are mobilities for hole and electron. However, the Hall resistivity is almost linear in *B* < 3T for whole temperature range covered in our measurements (see the inset of Fig. S2**c**). Fig. S2**d** shows the perfect fitting of two-carrier model to MR and Hall resistivity at 2K. The red lines are the fitting line. Figs. S2**e** and S2**f** show mobilities and carrier densities, respectively. In *T* < 75K, one observes the compensation of electron and hole carriers. And the mobility in this range is higher than 1000 cm2V-1s-1. All these results indicate the large MR results from the high mobilities and close to compensation electron and hole densities.





**Figure S2** **a** The temperature-dependent resistivity at zero field. The residual resistivity ratio (RRR= ) is 3 for sample #1. **b** and **c** The magnetic field-dependent longitudinal resistivity and Hall resistivity at *T* from 2K to 300K, respectively. The inset of **c** shows Hall resistivity at *B*<3T. **d** The two-carrier model fitting curves to longitudinal resistivity and Hall resistivity at 2K. **e** and **f** show carrier mobilities and carrier densities, respectively.

**Supplementary note 3: *B*-dependent in-plane Hall effect at 2K.**

Here we provide full data on IPHE at *B* from 0.1 T to 9 T. In low magnetic field range, we performed the detailed measurement. Figs. S3**a** and S3**b** show original data for longitudinal resistivity and Hall resistivity, respectively. In practical measurement, the plane of *B* rotation cannot be strictly coplanar with current plane or (111) plane. is the angle between two planes (see Fig. S3**c**). It will induce an out-of-plane B component. Thus, the Hall signal will include a normal Hall signal contribution. Since the varies periodically as a function of onefold sine with the direction of *B* rotation. Fig. S3**d** shows the separated signals, in-plane Hall resistivity and mismatch-induced out-of-plane normal Hall resistivty at 2 K and 1 T. Fig. S3**f** displays the extracted *B*-dependent amplitude of in-plane Hall resistivity . In B >3T, show Approximate linear dependence on magnetic field, which exhibits a completely different magnetic field dependent behavior than it does in the low field.





**Figure S3 a** and **b** The in-plane anisotropic magnetoresistance and Hall resistivity for sample #1 at 2K and *B* from 0.1T to 9T. **c** The schematic of in-plane measurement with *B* and *I* plane mismatch. In practical measurement, the current plane is not critically coplanar with *B* rotation plane, which will induce an out-of-plane Hall contribution. **d** The separated Hall signals at 2K and 1T. **e** The extracted in-plane Hall resistivity curves at *B* from 0.1T to 9T. **f** The B-dependent amplitude of in-plane Hall resistivity .

**Supplementary note 4: The calculation of in-plane Hall conductivity for sample #2.**

For in-plane Hall effect,  is usually unavoidable in the symmetric system. Therefore, the conductivities cannot be estimated by simple formulae: and , but the non-simple formulae: and. Figs. S4**a** and 3**b** show the in-plane longitudinal conductivity and extracted in-plane Hall conductivity .





**Figure S4** **a** and **b** represent the in-plane longitudinal conductivity and Hall conductivity curves at *T* = 2K and *B* = 9T for sample #2.

**Supplementary note 5: The temperature dependent IPHE at 6 T and 9 T.**

Here, we also provide the detailed *T*-dependent in-plane anisotropic longitudinal conductivity and in-plane Hall conductivity at *B* = 6 T and 9 T.





**Figure S5a** and **S5b** show in-plane anisotropic magnetoresistance and in-plane Hall conductivity curves for *T* from 2K to 300K at *B* = 6T, respectively. **c** and **d** show in-plane anisotropic magnetoresistance and in-plane Hall conductivity curves for *T* from 2K to 300K at *B* = 9T, respectively.

**Supplementary note 6: Comparison of our in-plane Hall conductivity with previously reported data.**

Comparison of our in plane Hall conductivity and previously reported data for current IPHE systems. The reported data were taken from references that can be found in the Table S1.

**Table S1** Summary of in plane Hall conductivity , corresponding temperature and magnetic field.

| IPHE systems | () | *T*(K)/*B*(T) | *reference* |
| --- | --- | --- | --- |
| ZrTe | 47.1 | 2.5K/3T | 1 |
| ZrTe51, 2 | 17.3 | 48K/3T | 2 |
| DyPtBi3 | 22.9 | 4K/3T | 3 |
| VS-VS24 | 118.8 | 2K/3T | 4 |
| Fe-film5 | 189 | 5K/3T | 5 |
| EuZn2Sb26 | 0.31 | 2K/4.4T | 6 |
| Co3Sn2S27 | 12 | 5K/3T | 7 |
| Fe3Sn28 | 30.6 | 10K/3T | 8 |
| LuAuSn | 306 | 2K/3T | This work |

1.Liang T*, et al.* Anomalous Hall effect in ZrTe5. *Nat Phys* **14**, 451-455 (2018).

2.Wang Y, Bömerich T, Taskin AA, Rosch A, Ando Y. Parallel-field Hall effect in ZrTe5. *Phys Rev B* **111**, L041201 (2025).

3.Chen J*, et al.* Unconventional Anomalous Hall Effect in the Canted Antiferromagnetic Half-Heusler Compound DyPtBi. *Adv Funct Mater* **31**, 2107526 (2021).

4.Zhou J*, et al.* Heterodimensional superlattice with in-plane anomalous Hall effect. *Nature* **609**, 46-51 (2022).

5.Chen H*, et al.* Strain-induced in-plane anomalous Hall effect in single-crystalline Fe(211) films. *Phys Rev B* **111**, (2025).

6.Lee H*, et al.* Difference in the in-plane anomalous Hall response in thin films of the Zintl compound EuA2Sb2 (A=Zn,Cd). *Phys Rev B* **111**, (2025).

7.Wang L*, et al.* In-plane Hall effect in Co3Sn2S2. *Phys Rev B* **111**, 054412 (2025).

8.Wang L*, et al.* Orbital Magneto-Nonlinear Anomalous Hall Effect in Kagome Magnet Fe3Sn2. *Phys Rev Lett* **132**, 106601 (2024).
